# Supplementary material for: Gut-Microbiota, and Multiple Sclerosis: Background, Evidence, and Perspectives
Source: MDPI journal article supplement (doi:10.3390/nu15040942), 2023-02-14
Supplement: s1 [file s1]

**Table S1.** Composition of human gut microbiota.

| PHYLUM                 | Relative abundance | Genera and species                                                                                                                     | Main functions                                                                                           |
|------------------------|--------------------|----------------------------------------------------------------------------------------------------------------------------------------|----------------------------------------------------------------------------------------------------------|
| <i>Firmicutes</i>      | 60-65%             | <i>Clostridium</i><br><i>Eubacterium</i><br><i>Faecalibacterium</i><br><i>Lactobacillus</i><br><i>Roseburia</i><br><i>Ruminococcus</i> | Fiber fermentation and butyrate production                                                               |
| <i>Bacteroidetes</i>   | 20-25%             | <i>Alistipes</i><br><i>Bacteroides</i><br><i>Parabacteroides</i><br><i>Prophyromonas</i><br><i>Prevotella</i>                          | Catabolism of polysaccharides<br><br>Fiber fermentation and butyrate production                          |
| <i>Proteobacteria</i>  | 5-10%              | <i>Escherichia coli</i>                                                                                                                |                                                                                                          |
| <i>Actinobacteria</i>  | 3%                 | <i>Bifidobacterium</i><br><i>Colinsella</i>                                                                                            | Synthesis of vitamins                                                                                    |
| <i>Archaea</i>         | <1%                | <i>Methanobrevibacter</i><br><i>Methanosphaera</i>                                                                                     | Methane production                                                                                       |
| <i>Deferribacteres</i> | <1%                |                                                                                                                                        | Iron degradation                                                                                         |
| <i>Fusobacteria</i>    | <1%                | <i>Fusobacterium nucleatum</i>                                                                                                         | Tumorigenic factor with proinflammatory properties                                                       |
| <i>Melainabacteria</i> | <1%                |                                                                                                                                        | Production of vitamins B and K, fermentation of carbohydrates, synthesis of ethanol, lactate and formate |
| <i>Spirochaetes</i>    | <1%                | <i>Treponema</i>                                                                                                                       |                                                                                                          |
| <i>Verrucomicrobia</i> | <1%                | <i>Akkermansia muciniphila</i>                                                                                                         |                                                                                                          |
